# Supplementary material for: Novel Orthogonally Hydrocarbon-Modified Cell-Penetrating Peptide Nanoparticles Mediate Efficient Delivery of Splice-Switching Antisense Oligonucleotides In Vitro and In Vivo
Source: MDPI journal article supplement (doi:10.3390/biomedicines9081046), 2021-08-19
Supplement: s1 [file s1]

## Supplementary Information

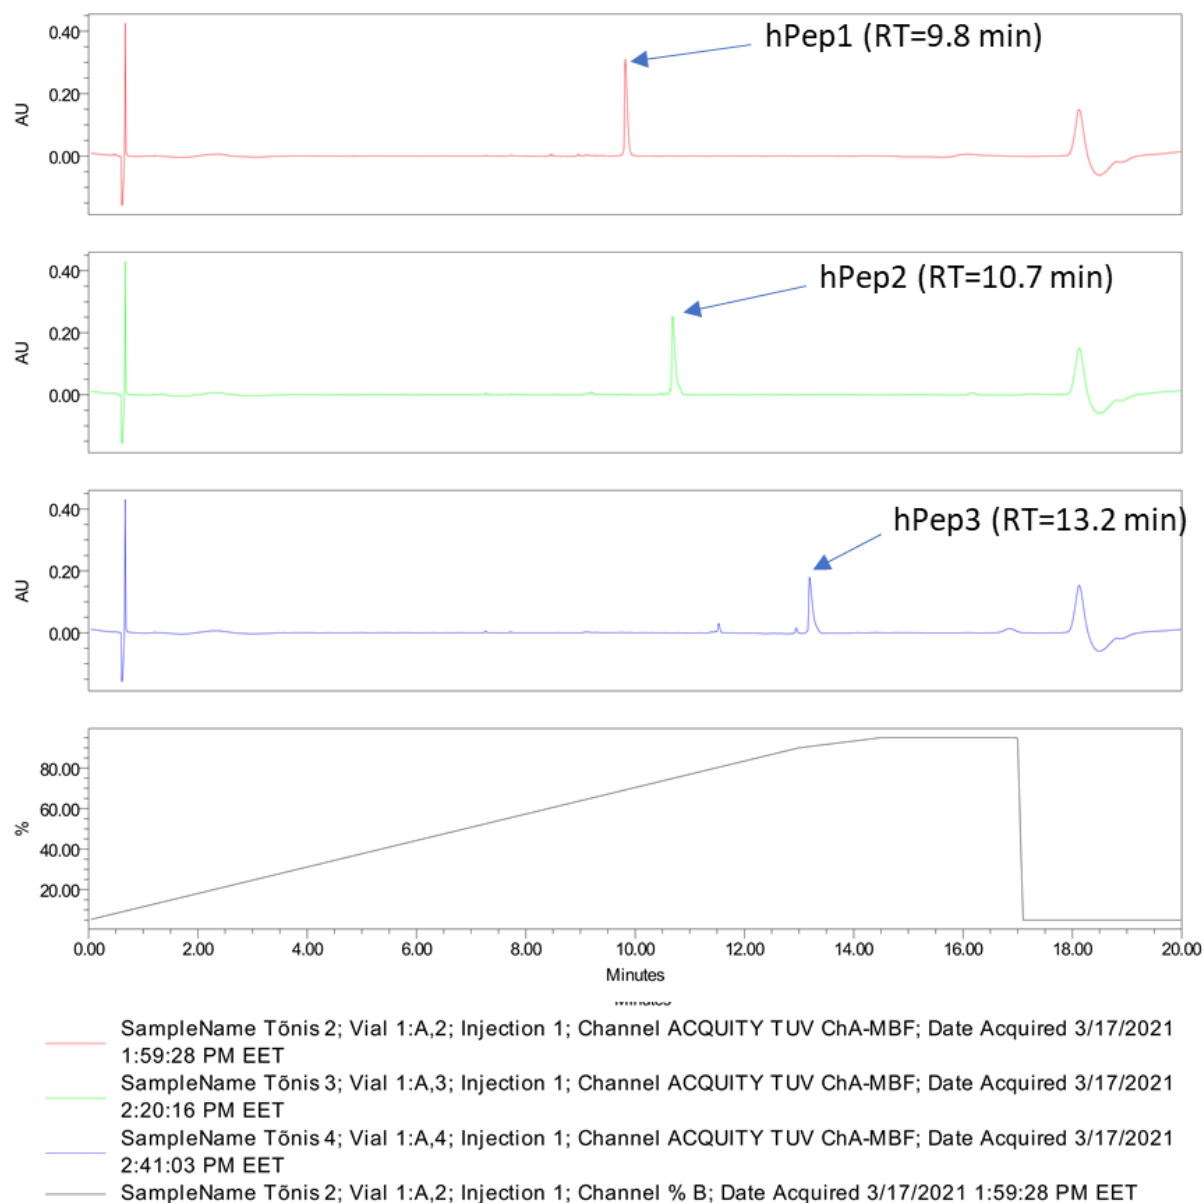

**Supplementary figure S1.** UPLC chromatograms of hPep peptides. In order to compare the hydrophobicities of the peptides we used RP-UPLC (Waters, Milford, MA) with AcN/water (0,1% TFA) gradient running from 5-90% in 13 min using a Acquity UPLC BEH130 C18 column (1.7 $\mu$ m 2.1 x 100mm).

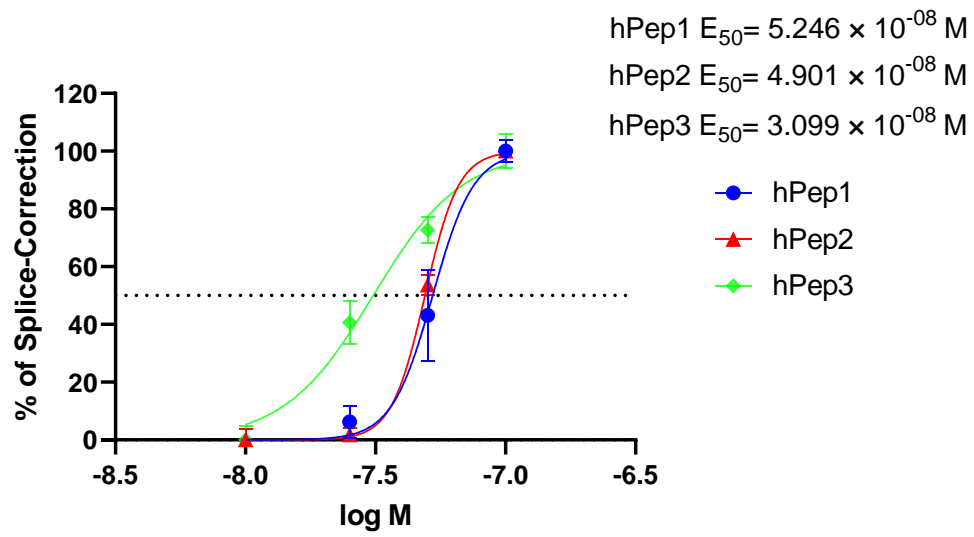

**Supplementary figure S2.** Half-maximal effective concentrations for hPep/SSO complexes in HeLa 705 cells on mRNA level.  $EC_{50}$  values were calculated from RT-PCR data with GraphPad Prism software from the 24 h treatment in serum-free conditions.
